# Supplementary material for: Quantification of cortisol in human eccrine sweat by liquid chromatography – tandem mass spectrometry
Source: Royal Society of Chemistry journal article supplement (doi:10.1039/c5an02387d), 2016-01-01
Supplement: c5an02387d1.pdf [file c5an02387d1.pdf]

Supplemental Data for:

## Quantification of Cortisol in Human Eccrine Sweat by Liquid Chromatography - Tandem Mass Spectrometry

Min Jia\*†, Wade M. Chew‡, Yelena Feinstein ‡, Perry Skeath†, Esther M. Sternberg\*†

†Arizona Center for Integrative Medicine, College of Medicine, the University of Arizona, Tucson, AZ 85724, United States

‡Arizona Cancer Center, the University of Arizona, Tucson, AZ 85724, United States

‡Center for Toxicology, College of Pharmacy, the University of Arizona, Tucson, AZ 85724, United States

Table S1. Comparison of different sweat extraction methods

|                     |                           |                                          |                                                           |
|---------------------|---------------------------|------------------------------------------|-----------------------------------------------------------|
| Sample Prep Method: | 1. Centrifuge+ vacuum dry | 2. Filtering with 0.2 micro + vacuum dry | 3. Acetonitrile + ethyl acetate + centrifuge + vacuum dry |
| Spiking Recovery:   | 80%                       | 25%-40%                                  | 107%                                                      |
| Problems:           | reproducibility           | Analyte loss, reproducibility            | N/A                                                       |

Table S2. Stability of cortisol in human eccrine sweat at room temperature

| Time              | Concentration (ng/ml) |
|-------------------|-----------------------|
| unspiked          | 3.488                 |
| spiked 0 minutes  | 29.191                |
| spiked 30 minutes | 36.802                |
| spiked 1 hour     | 30.807                |
| spiked 2 hours    | 30.228                |
| spiked 3 hours    | 29.515                |
